# Supplementary material for: Diversity and assembly processes of microeukaryotic community in Fildes Peninsula Lakes (West Antarctica)
Source: Copernicus journal article supplement (doi:10.5194/bg-2022-75), 2022-04-19
Supplement: Supplementary file [file bg-2022-75-AC2-supplement.pdf]

## Reviewer2#

The article “Diversity and assembly processes of microeukaryotic community in Fildes Peninsula Lakes (West Antarctica)” by authors Zhang et al. is an impressive effort to characterize and interpret protist communities in hard to reach and understudied ecosystems. The authors analyze protist communities from the same lakes every austral summer for three years. This provides a unique opportunity to understand how stable these communities are over time. The authors discuss the dominant taxa—Crysophyta, Cryptophyta, and Chlorophyta—and how their abundance relates to environmental factors and is influenced by biotic interactions, and whether the community assembly processes are mainly deterministic or stochastic. Overall, the authors conclude that environmental factors contribute little to community composition, interactions are mainly positive between taxa, and stochastic factors primarily shape community assembly. This is a unique study, due to its temporal component, and it documents important aspects of rapidly changing ecosystems in Antarctica. Below are comments that I believe will help improve the manuscript.

## General Response to Reviewer 2 Comments

Thanks for your comments and suggestions. We are appreciated with your helpful advice, and we have made our efforts to revise the manuscript with clarifications/elaborations as following.

**Our response** is in **normal font** and colored in **blue**, and *the revised text* is in *italic font* and colored in *blue*.

## General comments

My main concern is the pre-filtering step in the methods and how that might influence the subsequent results and interpretation. The methods state that the water was pre -filtered through 20 micron mesh-size to remove “mesoplankton and large particles” and then biomass was collected onto a 0.2 micron pore-size filter. This step

actually removes all of the microplankton and leaves behind the nano and picoplankton. This has obvious implications for the title and the language throughout the manuscript, but also has more important implications for the interpretation of the results. The authors note that there is less diversity in these samples than in similar studies, which I suspect could be due to more aggressive filtering? The authors also note in the introduction that diatoms have been studied in Antarctic lakes previously but they do not report finding significant proportions of diatoms in their samples, which could also be an artifact of the size fractionation in this study. Finally, the authors report mainly positive relationships in their co-occurrence network analysis. Again, I think this may be due to the size selection, as microeukaryotes are more likely to graze nano and pico eukaryotes. However, the observation that there seems to be more niche-overlap than competition between nano and pico eukaryotes remains very interesting. Lastly, I feel that it is incorrect to refer to the positive interactions as symbiotic without further evidence documenting symbiotic relationships between the node OTUs being discussed.

### **About Prefiltering?**

**Response:** Antarctic freshwater ecosystems are relatively simple, and the majority of Antarctic lakes are known as ultra-oligotrophic to oligotrophic, which only allow a few species to adapt to such extreme environments resulting in truncated simplified food webs.

Microbial eukaryotes (0.2~20  $\mu\text{m}$ , pico-/nano-eukaryotes) constitute important components in microbial food webs and play an important role in the biogeochemical cycles (Grob et al., 2007; Massana et al., 2015; Unrein et al., 2014), as well as in plankton biomass and contribute to carbon export (Hernandez-Ruiz et al., 2018; Leblanc et al., 2018). Molecular ecology studies have shown that microbial eukaryotes exhibit high biodiversity in some oligotrophic and extreme regions (Marquardt et al., 2016; Richards et al., 2005; Zhao et al., 2011).

However, the smaller-sized plankton were neglected for a long term due to lack of

more precise information. Many questions, such as what they are, how their ecological functions are, and how the population fluctuations are in these far cold and oligotrophic lakes, were required further study by using the modern or integrative techniques. The appearance of large metazoan as multicellular organisms could cause an artificially underestimate the smaller size organisms “mostly unicellular organisms” in the molecular sequencing. So proper prefiltering is necessary for understanding these particular populations as nano- and pico-, specifically does the high-throughput sequencing. This is why we choose the prefiltering for the high-throughput sequencing for the very beginning of these consecutive yearly investigations.

The phrase “microeukaryotes” might be the problematic issue, so we would amend it into “microbial eukaryotes” in this case, including the size  $\leq 20 \mu\text{m}$  pico- and nano-eukaryotes. Thus, we do hope that our study would provide a better understanding of the dynamic patterns and ecological processes of microbial eukaryotic community structure in Antarctic oligotrophic lakes (Fildes Peninsula).

- (1) Grob, C., Ulloa, O., Li, W.K.W., Alarcon, G., Fukasawa, M. and Watanabe, S. (2007). Picoplankton abundance and biomass across the eastern South Pacific Ocean along latitude 32.5 degrees S. *Marine Ecology Progress Series*, 332, 53-62. <https://doi.org/DOI.10.3354/meps332053>.
- (2) Massana, R., Gobet, A., Audic, S., Bass, D., Bittner, L., Boutte, C., Chambouvet, A., Christen, R., Claverie, J.M., Decelle, J., Dolan, J.R., Dunthorn, M., Edvardsen, B., Forn, I., Forster, D., Guillou, L., Jaillon, O., Kooistra, W.H.C.F., Logares, R., Mahe, F., Not, F., Ogata, H., Pawlowski, J., Pernice, M.C., Probert, I., Romac, S., Richards, T., Santini, S., Shalchian-Tabrizi, K., Siano, R., Simon, N., Stoeck, T., Vaulot, D., Zingone, A. and de Vargas, C. (2015). Marine protist diversity in European coastal waters and sediments as revealed by high-throughput sequencing. *Environmental Microbiology*, 17(10), 4035-4049. <https://doi.org/10.1111/1462-2920.12955>.
- (3) Unrein, F., Gasol, J.M., Not, F., Forn, I. and Massana, R. (2014). Mixotrophic haptophytes are key bacterial grazers in oligotrophic coastal waters. *ISME Journal*, 8(1), 164-176. <https://doi.org/10.1038/ismej.2013.132>.
- (4) Hernandez-Ruiz, M., Barber-Lluch, E., Prieto, A., Alvarez-Salgado, X.A., Logares, R. and Teira, E. (2018). Seasonal succession of small planktonic eukaryotes inhabiting surface waters of a coastal upwelling system. *Environ Microbiol*, 20(8), 2955-2973. <https://doi.org/10.1111/1462-2920.14313>.
- (5) Marquardt, M., Vader, A., Stubner, E.I., Reigstad, M. and Gabrielsen, T.M. (2016). Strong Seasonality of Marine Microbial Eukaryotes in a High-Arctic Fjord (Isfjorden, in West Spitsbergen, Norway). *Appl Environ Microbiol*, 82(6), 1868-1880. <https://doi.org/10.1128/AEM.03208-15>.
- (6) Richards, T.A., Vepritskiy, A.A., Gouliamova, D.E. and Nierzwicky-Bauer, S.A. (2005). The molecular diversity of freshwater picoeukaryotes from an oligotrophic lake reveals diverse,

distinctive and globally dispersed lineages. *Environ Microbiol*, 7(9), 1413-1425.  
<https://doi.org/10.1111/j.1462-2920.2005.00828.x>.

- (7) Zhao, B., Chen, M., Sun, Y., Yang, J. and Chen, F. (2011). Genetic diversity of picoeukaryotes in eight lakes differing in trophic status. *Can J Microbiol*, 57(2), 115-126.  
<https://doi.org/10.1139/w10-107>.

### **About the relative abundance of diatom?**

**Response:** Diatoms in the lakes of Fildes Peninsula region were reported as the first predominant population, accounting for 59.8% of the total number of phytoplankton species (Zhu et al., 2010). Similarly, our microscopic observations on the phytoplankton samples (without pre-filtering) showed that diatoms are dominant as well (unpublished data), which was not involved into this discussion yet. Still, we have traced some sequencing reads related to diatoms in the sequencing dataset even after the “artificial” prefiltering.

However, this study was based on a high-throughput sequencing approach with a more precise means of focusing on the smaller size of eukaryotes that are easily underestimated in such Antarctic oligotrophic lakes. In this case, diatoms were not the dominant taxa (relative abundance >1% at any lake) in the 0.2~20 µm size range, and their relative abundance varied from 0.007% in YY\_19 ~ 0.633% in CH\_18. Diatoms were not abundant within the small-eukaryotes (0.2~20 µm) community in agreement with other studies (Hernandez-Ruiz et al., 2018).

- (1) Zhu, G.H., OHTANI Shuji, HU Chuan-yu, HE Jian-feng, JIN Mao, YU Pei-song and Jian-ming, P. (2010). Impact of global climate change on antarctic freshwater algae. *China Environmental Science*, 30(3), 400-404.
- (2) Hernandez-Ruiz, M., Barber-Lluch, E., Prieto, A., Alvarez-Salgado, X.A., Logares, R. and Teira, E. (2018). Seasonal succession of small planktonic eukaryotes inhabiting surface waters of a coastal upwelling system. *Environ Microbiol*, 20(8), 2955-2973.  
<https://doi.org/10.1111/1462-2920.14313>.

### **The lower diversity compared with other similar studies?**

**Response:** The results of the comparison with other similar studies were shown in Table 1. The results showed that the richness (OTUs) and Shannon index of microbial eukaryotes were indeed lower in our study area. More references have been added to

our manuscript.

Table 1 Comparison of microbial eukaryotes richness and Shannon index in different study areas.

|                                                                                            | Object of study                    | Richness  | Range of richness     | Shannon index              |
|--------------------------------------------------------------------------------------------|------------------------------------|-----------|-----------------------|----------------------------|
| Our study                                                                                  | Microbial eukaryotes<br>(0.2~20µm) | 520       | 113~268<br>(178±46)   | 1.70~3.50<br>(2.72 ± 0.52) |
| The Northern South<br>China Sea (Wang et<br>al., 2021)                                     | Pico-/Nanoeukaryotes               | 3198/3233 | /                     | /                          |
| The Coastal Oceans<br>(Wang et al., 2020)                                                  | Pico-/Nanoeukaryotes               | 1590      | 178~233               | /                          |
| The surface waters of<br>a coastal upwelling<br>system<br>(Hernandez-Ruiz et<br>al., 2018) | Small eukaryotes<br>(0.2~20µm)     | /         | 180~511<br>(337 ± 89) | 2.37~5.18<br>(4.12 ± 0.84) |

**Note:** The “/” indicates no relevant data in the References.

- (1) Wang, F., Huang, B., Xie, Y., Cai, S., Wang, X. and Mu, J. (2021). Diversity, Composition, and Activities of Nano- and Pico-Eukaryotes in the Northern South China Sea With Influences of Kuroshio Intrusion. *Frontiers in Marine Science*, 8. <https://doi.org/10.3389/fmars.2021.658233>.
- (2) Wang, Y., Li, G., Shi, F., Dong, J., Gentekaki, E., Zou, S., Zhu, P., Zhang, X. and Gong, J. (2020). Taxonomic Diversity of Pico-/Nanoeukaryotes Is Related to Dissolved Oxygen and Productivity, but Functional Composition Is Shaped by Limiting Nutrients in Eutrophic Coastal Oceans. *Front Microbiol*, 11, 601037. <https://doi.org/10.3389/fmicb.2020.601037>.
- (3) Hernandez-Ruiz, M., Barber-Lluch, E., Prieto, A., Alvarez-Salgado, X.A., Logares, R. and Teira, E. (2018). Seasonal succession of small planktonic eukaryotes inhabiting surface waters of a coastal upwelling system. *Environ Microbiol*, 20(8), 2955-2973. <https://doi.org/10.1111/1462-2920.14313>.

## Co-occurrence network?

**Response:** We agreed with the reviewer that the information regarding the positive interactions as symbiotic without further evidence is not suitable. Co-occurrence/non-coexistence patterns among populations may reflect either niche overlap/partitioning or positive/negative ecological interactions such as commensalism, mutualism, or competition. In our study, we found many positive correlations in the co-occurrence network. However, further studies are necessary to

corroborate the biological interactions and other nonrandom processes (for example, cross-feeding versus niche overlap) between species pairs detected by network analyses. Consequently, we have revised in the abstract and discussion.

**Abstract:** *“Finally, network analysis revealed comprehensive cooccurrence relationships in the microbial eukaryotic community (positive correlation 82% vs. negative correlation 18%).”*

**Discussion:** *“By analyzing the network, we found that the positive correlations were much more than the negative correlations in the co-occurrence network (82% vs. 18%), revealing that positive relationships (e.g., due to cross-feeding, niche overlap, mutualism, and/or commensalism) might exhibit a more important role than negative relationships (e.g., predator-prey relationships, host-parasite relationships and/or competition) (Chen and Wen 2021) in studied Antarctic lake ecosystem. A similar result has been found in small planktonic eukaryotes (0.2~20  $\mu\text{m}$ ) inhabiting the surface waters of a coastal upwelling system (Hernandez-Ruiz et al., 2018). Notwithstanding, further studies are necessary to corroborate the biological interactions and other nonrandom processes (for example, cross-feeding versus niche overlap) between species pairs detected by network analyses.”*

- (1) Chen, W. and Wen, D. (2021). Archaeal and bacterial communities assembly and co-occurrence networks in subtropical mangrove sediments under *Spartina alterniflora* invasion. *Environ Microbiome*, 16(1), 10. <https://doi.org/10.1186/s40793-021-00377-y>.
- (2) Hernandez-Ruiz, M., Barber-Lluch, E., Prieto, A., Alvarez-Salgado, X.A., Logares, R. and Teira, E. (2018). Seasonal succession of small planktonic eukaryotes inhabiting surface waters of a coastal upwelling system. *Environ Microbiol*, 20(8), 2955-2973. <https://doi.org/10.1111/1462-2920.14313>.

### **Technical comments:**

(1) In the methods and throughout, I suggest choosing one spelling for each lake and sticking with it for consistency.

**Response:** Thank you. We have revised one spelling for each lake. When first described, the five lakes were described as Lake Xi Hu (XH), Lake Yan Ou (YO), Lake Chang Hu (CH), Lake Yue Ya (YY), and Lake Kitec (KT). In other parts, each

lake was indicated by the abbreviation.

(2) Line 123- I suggest abbreviating temperature just as Temp, similar to using Sal for salinity. WT adds an unnecessary additional acronym. And please complete the statement YSI Model 30 ... what type of instrument, a CTD?

**Response:** We used the WT to describe the “water temperature” based on other references, and the temp may be misinterpreted as air temperature. In the descriptions of results, figures, and tables in our manuscript, we have consistently used WT.

And we have revised the “YSI Model 30” to “*RBRconcerto C.T.D (Canada)*”

(3) Line 143- “PCR products were pooled and purified using the DNA gel extraction kit.” I think this statement is a mistake as pooling should not occur at this step ...

**Response:** We have revised a detailed description to the PCR amplification. “*The PCR product was extracted from 2% agarose gel and purified using the AxyPrep DNA Gel Extraction Kit (Axygen Biosciences, Union City, CA, USA) according to manufacturer’s instructions and quantified using Quantus™ Fluorometer (Promega, USA). Purified amplicons were pooled in equimolar and paired-end sequenced on an Illumina MiSeq PE300 platform (Illumina, San Diego, USA) according to the standard protocols by Wefind Biotechnology Co., Ltd. (Wuhan, China).*”

(4) Line 148- please provide more information regarding the sequencing. The first line of the section states the instrument model, but which version chemistry was used? How many base pairs were sequenced (300?)? And paired or single end?

**Response:** Thanks for your suggestion. We have provided more information regarding the sequencing as the response mentioned above. “*Purified amplicons were pooled in equimolar and paired-end sequenced (2×300) on an Illumina MiSeq platform (Illumina, San Diego, USA) according to the standard protocols by Wefind Biotechnology Co., Ltd. (Wuhan, China).*”

(5) Line 149- the bioinformatics methods are a bit dated. For instance, why did you use qiime instead of qiime 2? Why OTUs instead of ASVs? Likewise, the SILVA

database used is not the most recent and you might also consider using the PR2 database, which is curated specifically for protists. To be clear, I do not necessarily recommend redoing the analysis with more up to date methodology, but I do recommend justifying your decisions with an explanatory sentence.

**Response:** Thanks for your question. I am very sorry for the trouble I caused to the reviewer by my typing mistakes. For example, the “QIIME” should be “*QIIME1.9.1*”, and the “SILVA database (Release 132)” should be “*SILVA database (Release 138)*”. Furthermore, the data were analyzed with the free online Majorbio I-Sanger Cloud Platform (<http://www.majorbio.com/>). In this platform, the latest version of all the analysis software would be updated from time to time. QIIME 1.9.1 software is still used to generate abundance tables for each taxonomic level. And we utilized the SILVA database (Release 138), which contains high-quality 18S genes (Quast et al. 2013), to determine operational taxonomic units (OTUs).

In the manuscript, we have made a detailed addition to the Illumina MiSeq sequencing and Processing of sequencing data. “*The raw 18S rRNA gene sequencing reads were demultiplexed, quality-filtered by fastp version 0.20.0 (Chen et al., 2018) and merged by FLASH version 1.2.7 (Magoc and Salzberg 2011) with the following criteria: (i) the 300 bp reads were truncated at any site receiving an average quality score of <20 over a 50 bp sliding window, and the truncated reads shorter than 50 bp were discarded, reads containing ambiguous characters were also discarded; (ii) only overlapping sequences longer than 10 bp were assembled according to their overlapped sequence. The maximum mismatch ratio of overlap region is 0.2. Reads that could not be assembled were discarded; (iii) Samples were distinguished according to the barcode and primers, and the sequence direction was adjusted, exact barcode matching, 2 nucleotide mismatch in primer matching.*”

“*Operational taxonomic units (OTUs) with 97% similarity cutoff were clustered using UPARSE version 7.1 (Edgar 2013), and chimeric sequences were identified and removed. The taxonomy of each OTU representative sequence was analyzed by RDP Classifier version 2.2 (Wang et al., 2007) against the 18S rRNA database (Silva v138)*”



*using confidence threshold of 0.7 (Quast C et al., 2013).”*

- (1) Quast C, Pruesse E, Yilmaz P, Gerken J, Schweer T, Yarza P, Peplies J and FO, G. (2013). The SILVA ribosomal RNA gene database project: improved data processing and web-based tools. *Nucleic Acids Research*, 41, 590-596. <https://doi.org/10.1093/nar/gks1219>.
- (2) Chen, S.F., Zhou, Y.Q., Chen, Y.R. and Gu, J. (2018). fastp: an ultra-fast all-in-one FASTQ preprocessor. *Bioinformatics*, 34(17), 884-890. <https://doi.org/10.1093/bioinformatics/bty560>.
- (3) Magoc, T. and Salzberg, S.L. (2011). FLASH: fast length adjustment of short reads to improve genome assemblies. *Bioinformatics*, 27(21), 2957-2963. <https://doi.org/10.1093/bioinformatics/btr507>.
- (4) Edgar, R.C. (2013). UPARSE: highly accurate OTU sequences from microbial amplicon reads. *Nature Methods*, 10(10), 996-+. <https://doi.org/10.1038/Nmeth.2604>.
- (5) Wang, Q., Garrity, G.M., Tiedje, J.M. and Cole, J.R. (2007). Naive Bayesian classifier for rapid assignment of rRNA sequences into the new bacterial taxonomy. *Applied and Environmental Microbiology*, 73(16), 5261-5267. <https://doi.org/10.1128/Aem.00062-07>.

Why Silva database instead of PR2 database?

**Response:** Thank you very much for your questions and suggestions, and we will be willing to try to use the PR2 database for subsequent studies. The Silva database is a more comprehensive database (including bacteria, archaea, and eukaryotes), which has been widely used to annotate in different particle size ranges of microbial eukaryotes (micro-, pico-, and nanoeukaryotes) (Liu et al., 2021; Wang et al., 2021; Zhang et al., 2021). We also affirm that the PR2 database is curated specifically for protists. However, based on other references, the silva138 database is sufficient for our analysis of microbial eukaryotes, thus facilitating our comparison with other similar studies.

- (1) Liu, Q., Zhao, Q., Jiang, Y., Li, Y., Zhang, C., Li, X., Yu, X., Huang, L., Wang, M., Yang, G., Chen, H. and Tian, J. (2021). Diversity and co-occurrence networks of picoeukaryotes as a tool for indicating underlying environmental heterogeneity in the Western Pacific Ocean. *Mar Environ Res*, 170, 105376. <https://doi.org/10.1016/j.marenvres.2021.105376>.
- (2) Wang, F., Huang, B., Xie, Y., Cai, S., Wang, X. and Mu, J. (2021). Diversity, Composition, and Activities of Nano- and Pico-Eukaryotes in the Northern South China Sea With Influences of Kuroshio Intrusion. *Frontiers in Marine Science*, 8. <https://doi.org/10.3389/fmars.2021.658233>.
- (3) Zhang, L., Yin, W., Wang, C., Zhang, A., Zhang, H., Zhang, T. and Ju, F. (2021). Untangling Microbiota Diversity and Assembly Patterns in the World's Largest Water Diversion Canal. *Water Res*, 204, 117617. <https://doi.org/10.1016/j.watres.2021.117617>.

Why OTUs instead of ASVs? Why QIIME1.9.1 instead of QIIME2?

**Response:** Thank you very much for your questions, and we are willing to accept these suggestions for subsequent studies. The Amplicon Sequence Variants (ASVs) are a feature of QIIME2 Pipeline and DADA2, which are equivalent to 100% OTUs (Callahan et al., 2016). ASVs require more stringent data quality and discard more data when performing noise reduction processing. However, some of the diversity indexes were not easily comparable with previous research using 97% sequence similarity OTUs if we choose the ASVs, and the comparison of these statistical results using the same pipeline remains much more persuasive. Furthermore, while there are good reasons to employ ASVs, we need not question the validity of results based on OTUs (Glassman and Martiny 2018).

- (1) Callahan, B.J., McMurdie, P.J., Rosen, M.J., Han, A.W., Johnson, A.J. and Holmes, S.P. (2016). DADA2: High-resolution sample inference from Illumina amplicon data. *Nat Methods*, 13(7), 581-583. <https://doi.org/10.1038/nmeth.3869>.
- (2) Glassman, S.I. and Martiny, J.B.H. (2018). BROADSCALE Ecological Patterns Are Robust to Use of Exact Sequence Variants versus Operational Taxonomic Units. *Ecological and Evolutionary Science*, 3(4), e00148-00118. <https://doi.org/10.1128/mSphere>.

(6) Line 161- here and elsewhere the OTUs index is referred to and I am not sure what this means. Perhaps you are referring to richness?

**Response:** We agreed with you that the information provided in “OTUs” is limited, even if operational taxonomic units (OTUs) do provide further details. The OTUs was used to describe richness in our manuscript. We have revised the “OTUs” to “*richness*” to reduce the confusion.

(7) 167- define MNTD at first use

**Response:** Thank you. We have already defined the MNTD at first use. “*mean nearest taxon distance (MNTD)*.”

(8) 179- Bray-Curtis distance or dissimilarity, Not similarity

**Response:** The Bray- Curtis distance varies from 0 to 1, and we used distance to calculate similarity “similarity indices=1- distance indices”. In order to reduce the confusion, we have already revised “All calculations were based on similarity

matrices calculated with the Bray-Curtis similarity index.” into “*All calculations were based on similarity matrices (1-dissimilarity of the Bray–Curtis distance metric).*”

(9) 181- I think you may want to scale these variables, especially for variance partitioning (z-scores)

**Response:** Yes, you are right. By transforming the data  $\log(x+1)$ , the effect of the magnitude can be reduced. Apart from the z-scores mentioned by the reviewer, the method used in this manuscript, i.e.  $\log(x+1)$  transformation, was mostly used in similar studies.

(10) 219- a range of 0.9 to 7.14°C does not feel similar

**Response:** Thank you. We have already revised in our manuscript. “*The water temperature (WT) of all five lakes varied from 0.90°C to 7.14°C, with...*”

(11) 222- molarity is mols per liter, so the units "uM L-1" is incorrect. Only uM should be reported.

**Response:** Revised.

(12) 226- the a of chlorophyll a should be italicized

**Response:** Revised.

(13) 227- salinity needs units (PSU?)

**Response:** Thank you. We have already revised in our manuscript and supplementary information.

(14) 223- the Good’s coverage is calculated based on singletons, so please clarify that it was calculated before quality filtering. Also, providing rarefaction curves in the supplemental material will increase confidence in adequate sequencing depth and coverage.

**Response:** Before quality filtering, the Good's coverage can be calculated. Early in our analysis, the OTUs, classified as metazoa, and unassigned sequences, were filtered based on taxonomic metadata. And the sequences were normalized at the

lowest sequences depth. The new Good's coverage will be calculated to judge if the libraries could represent most species in these samples. In our manuscript, the Good's coverage was obtained after quality filtering and all coverages were above 99% as required.

We have also already provided rarefaction curves in the supplemental material.

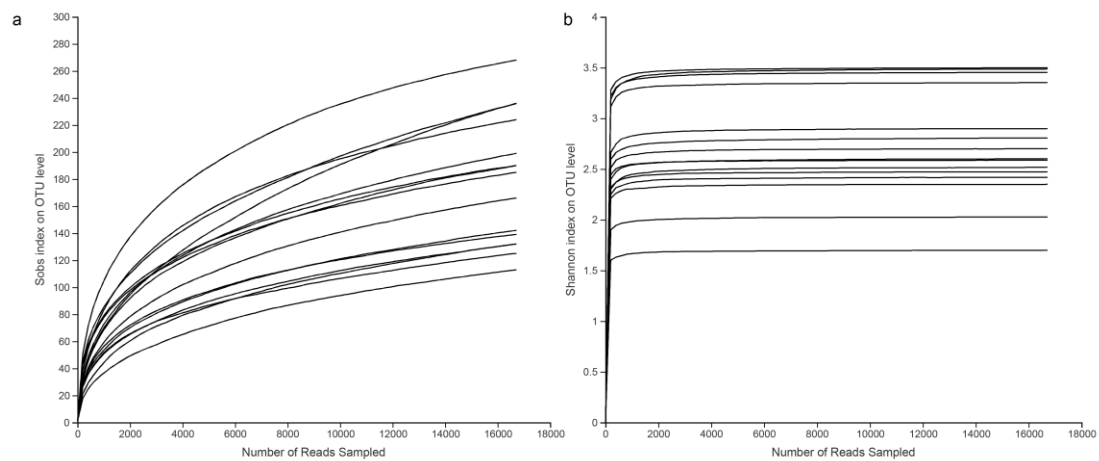

Fig. S1 Rarefaction curves of similarity-based operational taxonomic units (OTUs) at 97% sequence similarity level (a) and Shannon index(b).

(15) 246- SAR should be defined at its first appearance, I'm assuming stramenopiles-rhizaria-alveolates supergroup?

**Response:** Yes, you are right. We have revised the detailed information at its first appearance. “*Stramenopiles-Alveolates-Rhizaria (SAR)*”

(16) 251- 70.09% Arthropoda is .... a lot. Potentially fecal material since the samples were filtered through such fine mesh? I would consider excluding this sample unless the remaining sequencing reads still reach OTU saturation after the Arthropoda reads are removed. In general, you might consider removing metazoan reads early in the analysis.

**Response:** Agreed with you. It has been shown that, despite its shortcomings, filtration is the most feasible method for studying the diversity of eukaryotes size characteristics, and the method does reveal differences in the relative abundance of OTUs in different particle size ranges (Wang et al., 2021).

Based on the reviewer's suggestion, we re-analyzed the data by removing the

metazoan sequences reads in advance of the analysis, and sequences were normalized at the lowest sequences depth and rarefied at 16,717 reads, yielding a total of 520 OTUs. This analysis did not affect the main results and conclusion of our study (including lower diversity, dominant taxa, co-occurrence network and assembly processes). The results, figures and discussion have been revised and more references were added in our manuscript.

- (1) Wang, F., Huang, B., Xie, Y., Cai, S., Wang, X. and Mu, J. (2021). Diversity, Composition, and Activities of Nano- and Pico-Eukaryotes in the Northern South China Sea With Influences of Kuroshio Intrusion. *Frontiers in Marine Science*, 8. <https://doi.org/10.3389/fmars.2021.658233>.

(17) 267- still unclear what the OTU index is

**Response:** The OTUs represent the richness. We have revised the “OTUs” to “*richness*” to clear the confusion.

(18) 285- define UPGMA at first use

**Response:** The detailed information on UPGMA was provided in Line 172. “*unweighted pair-group method with arithmetic means (UPGMA)*”

(19) 287- rather than saying “clustered into one clade,” I think it is more correct to simply say “clustered together”

**Response:** Revised the “clustered into one clade” to “*clustered together*”.

(20) 345- while it is true that the taxa found in the samples are small cells and their small size makes them better adapted to low nutrient conditions, I think that it is hard to say whether they were more or less abundant than larger cells since all the larger cells were removed by pre-filtering with 20 um mesh. As such, this section probably should not take up so much space or prominence in the discussion.

**Response:** Agreed with you. Chrysophyta was the predominant taxa among the microbial eukaryotes in the particle size range of our interest (0.2~20 µm). We have reduced the description of the small cells and revised the manuscript. “*Firstly, the dominance may be due to the adaptation to low nutrient availability. Chrysophyta has been well represented mostly in oligo and mesotrophic lakes* (Allende 2009; Allende

and Izaguirre 2003; Izaguirre et al., 2020; Richards et al., 2005).”

- (1) Allende, L. (2009). Combined effects of nutrients and grazers on bacterioplankton and phytoplankton abundance in an Antarctic lake with even food-chain links. *Polar Biology*, 32(3), 493-501. <https://doi.org/10.1007/s00300-008-0545-6>.
- (2) Allende, L. and Izaguirre, I. (2003). The role of physical stability on the establishment of steady states in the phytoplankton community of two Maritime Antarctic lakes. *Hydrobiologia*, 502(1-3), 211-224. <https://doi.org/DOI 10.1023/B:HYDR.0000004283.11230.4a>.
- (3) Izaguirre, I., Allende, L. and Romina Schiaffino, M. (2020). Phytoplankton in Antarctic lakes: biodiversity and main ecological features. *Hydrobiologia*. <https://doi.org/10.1007/s10750-020-04306-x>.
- (4) Izaguirre, I., Allende, L. and Romina Schiaffino, M. (2020). Phytoplankton in Antarctic lakes: biodiversity and main ecological features. *Hydrobiologia*. <https://doi.org/10.1007/s10750-020-04306-x>.
- (5) Richards, T.A., Vepritskiy, A.A., Gouliamova, D.E. and Nierzwicki-Bauer, S.A. (2005). The molecular diversity of freshwater picoeukaryotes from an oligotrophic lake reveals diverse, distinctive and globally dispersed lineages. *Environ Microbiol*, 7(9), 1413-1425. <https://doi.org/10.1111/j.1462-2920.2005.00828.x>.

(21) 363- I am not sure what is meant by “forming temporary groups”— maybe change the word choice?

**Response:** We have supplied detailed information. Revised as “by forming temporary groups” to “*by forming temporary, non-swimming cell populations encased in a gelatinous mother cell membrane.*”

(22) 378- please clarify whether the other studies you are referring to used similar size fractionation

**Response:** Thanks for your question. We have confirmed the lower diversity in our study compared with other similar studies mentioned above, which use similar size fractionation. Also, more references were supplied. “*Compared with other aquatic ecosystems* (Hernandez-Ruiz et al., 2018; Wang et al., 2021; Wang et al., 2020), *the diversity...*”.

- (1) Wang, F., Huang, B., Xie, Y., Cai, S., Wang, X. and Mu, J. (2021). Diversity, Composition, and Activities of Nano- and Pico-Eukaryotes in the Northern South China Sea With Influences of Kuroshio Intrusion. *Frontiers in Marine Science*, 8. <https://doi.org/10.3389/fmars.2021.658233>.
- (2) Wang, Y., Li, G., Shi, F., Dong, J., Gentekaki, E., Zou, S., Zhu, P., Zhang, X. and Gong, J. (2020). Taxonomic Diversity of Pico-/Nano-eukaryotes Is Related to Dissolved Oxygen and Productivity, but Functional Composition Is Shaped by Limiting Nutrients in Eutrophic Coastal Oceans. *Front*

Microbiol, 11, 601037. <https://doi.org/10.3389/fmicb.2020.601037>.

- (3) Hernandez-Ruiz, M., Barber-Lluch, E., Prieto, A., Alvarez-Salgado, X.A., Logares, R. and Teira, E. (2018). Seasonal succession of small planktonic eukaryotes inhabiting surface waters of a coastal upwelling system. *Environ Microbiol*, 20(8), 2955-2973. <https://doi.org/10.1111/1462-2920.14313>.

(23) 426- “indicating that species coexistence was achieved mainly by symbiotic relationships between species” — I think this is an overstatement and not supported by the data.

**Response:** We have revised in the discussion. “By analyzing the network, we found that the positive correlations were much more than the negative correlations in the co-occurrence network (82% vs. 18%), revealing that positive interaction (e.g., due to cross-feeding, niche overlap, mutualism, and/or commensalism) might exhibit a more important role than negative interaction (e.g., predator-prey relationships, host-parasite relationships and/or competition) (Chen and Wen 2021) in studied Antarctic lake ecosystem. A similar result has been found in small planktonic eukaryotes (0.2~20  $\mu\text{m}$ ) inhabiting the surface waters of a coastal upwelling system (Hernandez-Ruiz et al., 2018). Notwithstanding, further studies are necessary to corroborate the biological interactions and other nonrandom processes (for example, cross-feeding versus niche overlap) between species pairs detected by network analyses.”

- (1) Chen, W. and Wen, D. (2021). Archaeal and bacterial communities assembly and co-occurrence networks in subtropical mangrove sediments under *Spartina alterniflora* invasion. *Environ Microbiome*, 16(1), 10. <https://doi.org/10.1186/s40793-021-00377-y>.
- (2) Hernandez-Ruiz, M., Barber-Lluch, E., Prieto, A., Alvarez-Salgado, X.A., Logares, R. and Teira, E. (2018). Seasonal succession of small planktonic eukaryotes inhabiting surface waters of a coastal upwelling system. *Environ Microbiol*, 20(8), 2955-2973. <https://doi.org/10.1111/1462-2920.14313>.

(24) 465- unclear which “channel” is being referred to, more context is needed

**Response:** Revised the “channel” to “*Middle Route Project of the South-to-North Water Diversion Projects in China.*”

(25) 478- what is “ecological scheduling”?

**Response:** Modified as “*regulating hydrodynamic conditions*”.

(26) 484- the statement regarding extreme conditions exerting less selection pressure seems incorrect?

**Response:** Thank you and we agreed with you! We have deleted this incorrect description.

(27) 511- again please be careful about assuming that positive co-occurrence patterns equate to symbioses, it seems niche-overlapping is more likely

**Response:** Yes. We agreed that this assuming is not suitable. Further studies are necessary to corroborate the biological interactions and other nonrandom processes (for example, cross-feeding versus niche overlap) between species pairs detected by network analyses.

(28) 520- please provide the PRJ number to make it easier to access all the sequences.

**Response:** Yes, we agreed and provided the PRJ number. “*PRJNA805287*”

(29) Figure 1- Please also include a large map that places the region in regional context (probably include Antarctic peninsula and tip of South America)

**Response:** Yes, we have provided a large map.



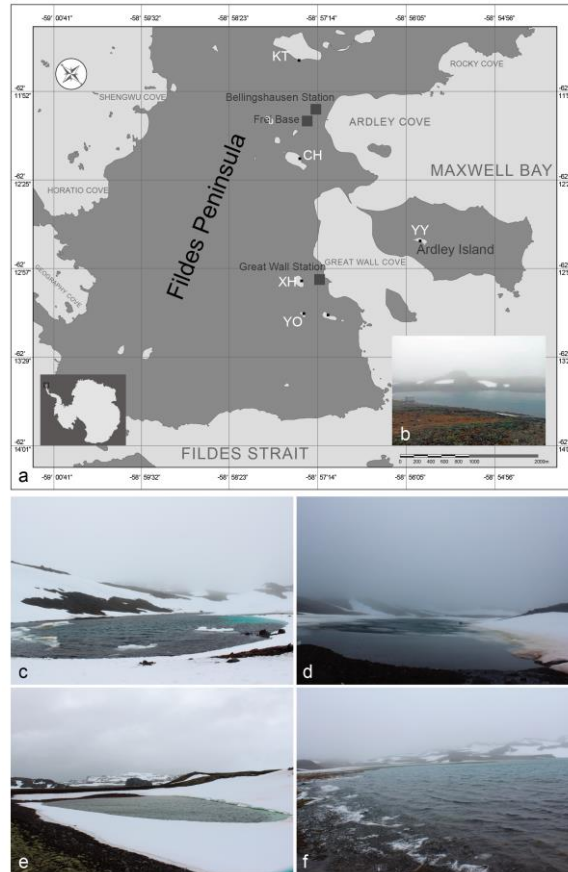

(30) Figure 3-The significance indications of letters are not defined in the figure caption. What do “a”, “b”, and “ab” mean?

**Response:** We agreed with you that the information provided in “ “a”, “b”, and “ab” mean” is rather limited, even if lines 965 and 966 do provide further details. “*The significant differences ( $P < 0.05$ ) were indicated by different alphabet letters between lakes, and lakes contained the same alphabet letters showed no significant difference ( $P > 0.05$ ).*”

### Other comments

English editing is needed throughout the manuscript. Below are a few edits that stood out to me.

(1) 125- nutrient to nutrients

**Response:** Thanks, we have revised these errors from the figure and the rest of the text.

(2) 189- opening sentence needs to be rewritten

**Response:** The opening sentence has been rewritten as “*We constructed one co-occurrence network based on samples from the whole study period.*”

(3) 190- “OTUs represented Occurred”?

**Response:** Revised as “*OTUs occurred*”.

(4) 217- Result to Results

**Response:** Revised.

(5) 350- “still keeps a high proportion” needs to be reworded

**Response:** Revised as “*still retains high cell density*”.

(6) 353 reference mistake “F R Pick”- remove 1st initials

**Response:** We are very sorry for the error, and we have revised citation of this reference “*Pick and Lean 1984*”.

(7) 406- “the nonconsecutive of environmental factors among different expedition seasons was deficient in our study” as is, I cannot make out the meaning of this sentence.

**Response:** It was very difficult to obtain all the environmental factors during our expedition. The unexplained community variation in this study could also be due to the absence of some important environmental factors that were not fully obtained. Future research should strive to obtain and consider more environmental factors. For a better understanding, we have revised this sentence to “*Firstly, it is not easy to obtain all environmental factors among different expedition seasons, and some important factors may exist that are not fully obtained or taken into account in the current study.*”
